# Supplementary material for: Thermal decomposition of ammonium nitrate (AN) in the presence of the optimized nano-ternary transition metal ferrite CoNiZnFe2O4
Source: Royal Society of Chemistry journal article supplement (doi:10.1039/d2ya00146b), 2022-01-01
Supplement: d2ya00146b1.pdf [file d2ya00146b1.pdf]

## Thermal decomposition of ammonium nitrate (AN) in the presence of optimized nano-ternary transition metal ferrite $\text{CoNiZnFe}_2\text{O}_4$

Pragnesh Dave<sup>[a]\*</sup> and Ruksana Sirach<sup>[a]</sup>

<sup>[a]</sup>Department of Chemistry, Sardar Patel University, Vallabh Vidyanagar, 388 120, Gujarat, India

\*Email: Pragnesh7@yahoo.com

### Supplementary file

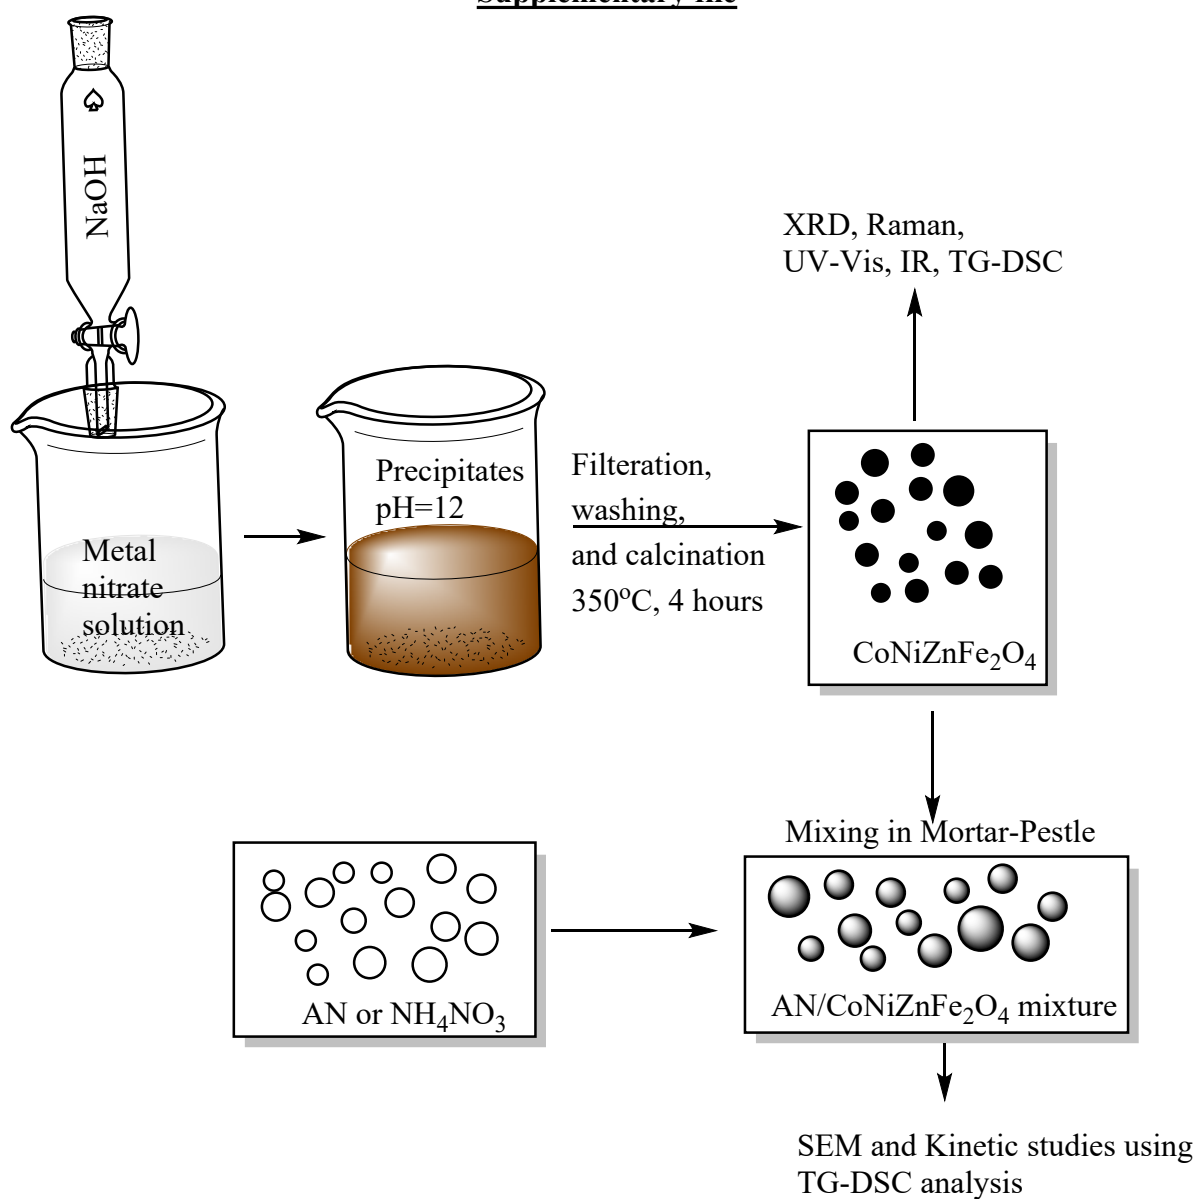

Figure S 1. Schematic representation for the synthesis of  $\text{CoNiZnFe}_2\text{O}_4$  and  $\text{AN/CoNiZnFe}_2\text{O}_4$  mixture

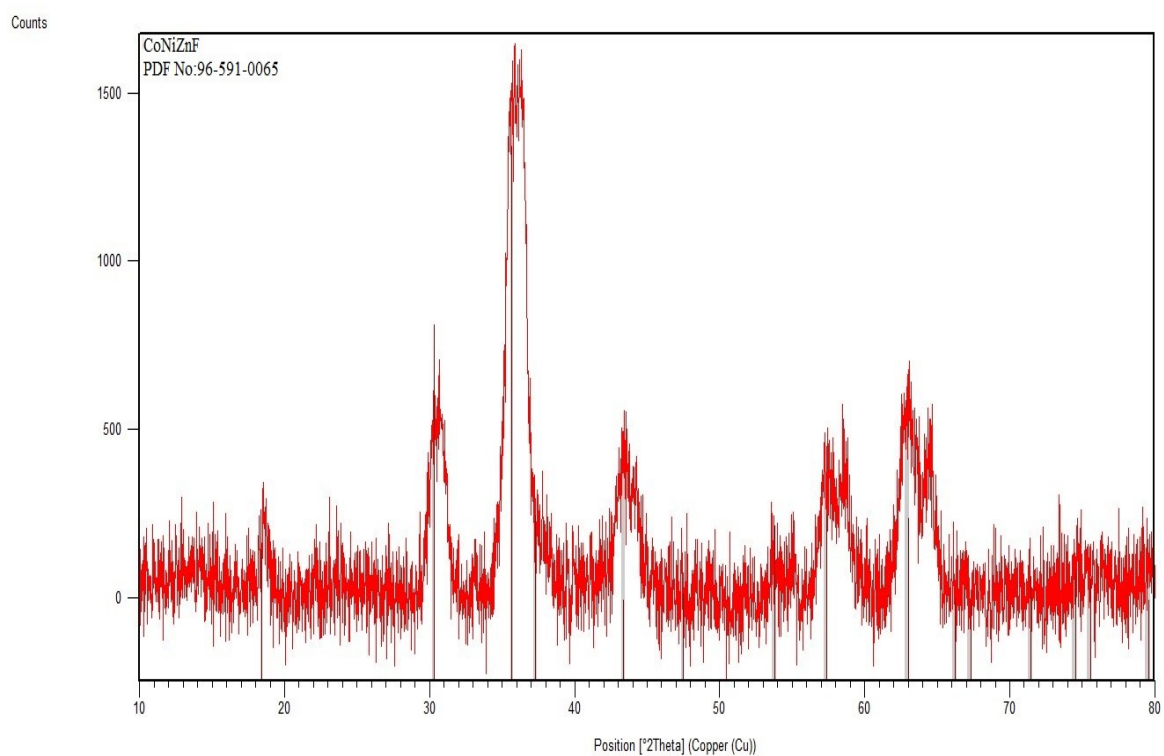

*Figure S 2. Indexed Powder XRD patterns of CoNiZnF*

Table S1. The concentration of metal ions in  $\text{CoNiZnFe}_2\text{O}_4$  was obtained using ICP-OES elemental analysis (Optima 8000, Perkin Elmer).

| Metal ions                        | Co  | Ni  | Zn  | Fe   |
|-----------------------------------|-----|-----|-----|------|
| Percent content of metal ions (%) | 8.2 | 8.2 | 9.0 | 47.4 |
